# Supplementary material for: Clinical characteristics, one-year change in ejection fraction and long-term outcomes in patients with heart failure with mid-range ejection fraction: a multicentre prospective observational study in Catalonia (Spain)
Source: PubMed Central journal article supplement — BMJ Open. 2017 Dec 21;7(12):e018719. doi: 10.1136/bmjopen-2017-018719 (PMC5778274; doi:10.1136/bmjopen-2017-018719), 2017-12-21
Supplement: bmjopen-2017-018719supp001.pdf [file bmjopen-2017-018719supp001.pdf]

## SUPPLEMENTAL MATERIAL

Table 1: Baseline clinical characteristics for the four hospital cohorts

|                                   | <b>All<br/>N=3580</b> | <b>Mar<br/>N=106<br/>2</b> | <b>H St Pau<br/>N=464</b> | <b>Can Ruti<br/>N=1835</b> | <b>Bellvitge<br/>N=219</b> | <b>P value</b> | <b>N</b> |
|-----------------------------------|-----------------------|----------------------------|---------------------------|----------------------------|----------------------------|----------------|----------|
| Male                              | 2232 (62.3)           | 603<br>(56.8)              | 315 (67.9)                | 1310<br>(71.4)             | 169 (77.2)                 | <0.001         | 3580     |
| Age                               | 68.2 (12.7)           | 72.4<br>(11.3)             | 67.6 (13.5)               | 66.8 (12.6)                | 61.0 (12.1)                | <0.001         | 3580     |
| LVEF                              | 38.3 (16.0)           | 44.8<br>(17.0)             | 42.8 (17.0)               | 34.2 (13.8)                | 31.9 (11.7)                | <0.001         | 3580     |
| HF group<br>according to<br>LVEF: |                       |                            |                           |                            |                            | <0.001         | 3580     |
| HFrEF                             | 2232 (62.3)           | 471<br>(44.4)              | 237 (51.1)                | 1339<br>(73.0)             | 185 (84.5)                 |                |          |
| HFmrEF                            | 504 (14.1)            | 158<br>(14.9)              | 75 (16.2)                 | 251 (13.7)                 | 20 (9.13)                  |                |          |
| HFpEF                             | 844 (23.6%)           | 433<br>(40.8)              | 152 (32.8)                | 245 (13.4)                 | 14 (6.39)                  |                |          |
| Aetiology:                        |                       |                            |                           |                            |                            | <0.001         | 3579     |
| ischemic                          | 1600 (44.7)           | 419<br>(39.5)              | 163 (35.1)                | 928 (50.6)                 | 90 (41.3)                  |                |          |
| dilated                           | 552 (15.4)            | 111<br>(10.5)              | 135 (29.1)                | 241 (13.1)                 | 65 (29.8)                  |                |          |
| hypertensive                      | 592 (16.5)            | 365<br>(34.4)              | 50 (10.8)                 | 173 (9.43)                 | 4 (1.83)                   |                |          |
| valvular                          | 321 (8.97)            | 48<br>(4.52)               | 77 (16.6)                 | 176 (9.59)                 | 20 (9.17)                  |                |          |
| other                             | 514 (14.4)            | 119<br>(11.2)              | 39 (8.41)                 | 317 (17.3)                 | 39 (17.9)                  |                |          |
| Heart rate                        | 72.7 (14.8)           | 74.5<br>(15.0)             | 73.4 (14.3)               | 71.8 (14.8)                | 70.5 (13.9)                | <0.001         | 3577     |
| Hypertension                      | 2485 (69.4)           | 857<br>(80.7)              | 351 (75.6)                | 1153<br>(62.8)             | 124 (56.6)                 | <0.001         | 3580     |
| Diabetes mellitus                 | 1547 (43.2)           | 503<br>(47.4)              | 182 (39.2)                | 771 (42.0)                 | 91 (41.6)                  | 0.008          | 3580     |
| COPD                              | 721 (20.1)            | 238<br>(22.4)              | 125 (26.9)                | 321 (17.5)                 | 37 (16.9)                  | <0.001         | 3580     |
| Dyslipidaemia                     | 1843 (51.5)           | 589<br>(55.5)              | 238 (51.3)                | 918 (50.0)                 | 98 (44.7)                  | 0.007          | 3580     |
| Atrial fibrillation               | 999 (27.9)            | 358                        | 208 (44.8)                | 389 (21.2)                 | 44 (20.2)                  | <0.001         | 3579     |

|                                 |                 |                 |                 |                 |                 |        |      |
|---------------------------------|-----------------|-----------------|-----------------|-----------------|-----------------|--------|------|
|                                 |                 | (33.7)          |                 |                 |                 |        |      |
| BMI, Kg/m <sup>2</sup>          | 27.8 (5.30)     | 28.3 (5.70)     | 28.4 (5.12)     | 27.4 (5.09)     | 26.5 (4.80)     | <0.001 | 3528 |
| Sodium, mmol/L                  | 139 (4.33)      | 140 (3.49)      | 140 (3.32)      | 138 (3.63)      | 139 (9.96)      | <0.001 | 3556 |
| Anaemia                         | 1104 (31.3)     | 420 (39.5)      | 127(27.4)       | 603 (33.8)      | 81 (37.0)       | <0.001 | 3526 |
| NT-proBNP, ng/L                 | 1638 (697;3937) | 1577 (688;3996) | 1618 (753;3701) | 1750 (704;4210) | 1420 (572;3198) | 0.217  | 2705 |
| eGFR, mL/min/1.73m <sup>2</sup> | 60.4 (25.4)     | 56.0 (22.5)     | 60.4 (25.7)     | 62.2 (26.4)     | 67.7 (25.2)     | <0.001 | 3562 |
| NYHA class III–IV               | 1293 (36.1)     | 452 (42.6)      | 172 (37.1)      | 573 (31.2)      | 96 (44.0)       | <0.001 | 3579 |
| Treatment:                      |                 |                 |                 |                 |                 |        |      |
| ACEI or ARB                     | 2992 (83.9)     | 793 (74.7)      | 397 (85.6)      | 1597 (87.0)     | 205 (99.5)      | <0.001 | 3567 |
| Beta-blockers                   | 3094 (86.4)     | 922 (86.8)      | 373 (80.4)      | 1611 (87.8)     | 188 (85.8)      | 0.001  | 3580 |
| MRA                             | 1890 (52.8)     | 406 (38.2)      | 232 (50.0)      | 1107 (60.3)     | 145 (66.2)      | <0.001 | 3580 |
| Loop diuretics                  | 3189 (89.1)     | 959 (90.3)      | 385 (83.0)      | 1654 (90.1)     | 191 (87.2)      | <0.001 | 3580 |
| Digoxin                         | 959 (27.7)      | 137 (12.9)      | 24 (6.84)       | 732 (39.9)      | 66 (30.1)       | <0.001 | 3467 |
| ICD                             | 396 (11.1)      | 24 (2.26)       | 74 (16.0)       | 232 (12.6)      | 66 (30.1)       | <0.001 | 3578 |
| CRT                             | 234 (6.54)      | 11 (1.04)       | 33 (7.11)       | 153 (8.34)      | 37 (16.9)       | <0.001 | 3580 |
| Anticoagulants                  | 1684 (47.0)     | 504 (47.5)      | 210 (45.3)      | 873 (47.6)      | 97 (44.3)       | 0.673  | 3580 |

Data are mean ± standard deviation, median (interquartile range) or n (%). P-values for the comparison of all four groups (null hypothesis: all three groups have the same characteristics). Anaemia was defined as a haemoglobin < 12 g/dL, ACEI, angiotensin converting enzyme inhibitor; ARB, angiotensin II receptor blocker; BMI, body mass

index; COPD, chronic obstructive pulmonary disease; CRT, cardiac resynchronization therapy; eGFR, estimated glomerular filtration rate (CKD-EPI equation); ICD, implantable cardioverter defibrillator; LVEF, left ventricular ejection fraction; MRA, mineralocorticoid receptor antagonists; NYHA, New York Heart Association; NT-proBNP, N-terminal pro-brain natriuretic peptide. HFrEF, heart failure with reduced left ventricle ejection fraction; HFmrEF, heart failure with mid-range left ventricle ejection fraction; HFpEF, heart failure with preserved left ventricle ejection fraction.

Table 2: Baseline clinical characteristics of patients with HFmrEF according to the change of HF category at 1-year follow up.

|                                    | All<br>N=269       | Mid-range<br>to reduced<br>N=64 | Mid-range to<br>mid-range<br>N=117 | Mid-range<br>to<br>preserved<br>N=88 | P value<br>overall | N   |
|------------------------------------|--------------------|---------------------------------|------------------------------------|--------------------------------------|--------------------|-----|
| Male                               | 197 (72.1)         | 52 (81.2)                       | 87 (74.4)                          | 55 (62.5)                            | 0.030              | 269 |
| Age                                | 65.2 (12.2)        | 67.0 (10.6)                     | 64.4 (12.5)                        | 64.8 (12.9)                          | 0.380              | 269 |
| LVEF                               | 42.9 (2.72)        | 41.9 (2.28)                     | 42.8 (2.51)                        | 44.0 (2.96)                          | <0.001             | 269 |
| Aetiology:                         |                    |                                 |                                    |                                      | 0.005              | 269 |
| ischemic                           | 144 (53.5)         | 44 (68.8)                       | 67 (57.3)                          | 33 (37.5)                            |                    |     |
| dilated                            | 36 (13.4)          | 5 (7.8)                         | 18 (15.4)                          | 13 (14.8)                            |                    |     |
| hypertensive                       | 26 (9.7)           | 5 (7.8)                         | 9 (7.7)                            | 12 (13.6)                            |                    |     |
| valvular                           | 24 (8.9)           | 6 (9.4)                         | 10 (8.6)                           | 8 (9.1)                              |                    |     |
| other                              | 39 (14.5)          | 4 (6.3)                         | 13 (11.1)                          | 22 (25.0)                            |                    |     |
| Heart rate                         | 70.0 (13.9)        | 69.5 (14.3)                     | 69.5 (13.8)                        | 71.1 (13.9)                          | 0.695              | 269 |
| Hypertension                       | 180 (66.9)         | 50 (78.1)                       | 76 (65.0)                          | 54 (61.4)                            | 0.080              | 269 |
| Diabetes mellitus                  | 112 (41.6)         | 26 (40.6)                       | 50 (42.7)                          | 36 (40.9)                            | 0.949              | 269 |
| COPD                               | 43 (16.0)          | 8 (12.5)                        | 19 (16.2)                          | 16 (18.2)                            | 0.637              | 269 |
| Dyslipidaemia                      | 156 (58.0)         | 41 (64.1)                       | 67 (57.3)                          | 48 (54.5)                            | 0.491              | 269 |
| Atrial fibrillation                | 81 (30.1)          | 18 (28.1)                       | 31 (26.5)                          | 32 (36.4)                            | 0.289              | 269 |
| BMI, Kg/m <sup>2</sup>             | 28.4 (5.1)         | 27.9 (5.1)                      | 28.2 (4.7)                         | 29.1 (5.7)                           | 0.323              | 263 |
| Sodium, mmol/L                     | 140 (3.2)          | 140 (3.4)                       | 140 (3.2)                          | 140 (3.2)                            | 0.887              | 265 |
| Anaemia                            | 84 (31.8)          | 24 (38.1)                       | 35 (30.4)                          | 25 (29.1)                            | 0.462              | 264 |
| NT-proBNP, ng/L                    | 1037<br>[502;3304] | 2186<br>[933;4456]              | 1000<br>[482;4287]                 | 901<br>[450;1690]                    | 0.005              | 190 |
| eGFR,<br>mL/min/1.73m <sup>2</sup> | 65.3 (26.2)        | 60.7 (27.0)                     | 64.2 (27.4)                        | 70.2 (23.5)                          | 0.078              | 264 |
| NYHA class III–IV                  | 74 (27.5)          | 18 (28.1)                       | 31 (26.5)                          | 25 (28.4)                            | 0.947              | 269 |
| Treatment:                         |                    |                                 |                                    |                                      |                    |     |
| ACEI or ARB                        | 224 (83.3)         | 50 (78.1)                       | 101 (86.3)                         | 73 (83.0)                            | 0.367              | 269 |
| Beta-blockers                      | 251 (93.3)         | 56 (87.5)                       | 111 (94.9)                         | 84 (95.5)                            | 0.135              | 269 |

|                |            |           |           |           |       |     |
|----------------|------------|-----------|-----------|-----------|-------|-----|
| MRA            | 130 (48.3) | 40 (62.5) | 54 (46.2) | 36 (40.9) | 0.026 | 269 |
| Loop diuretics | 218 (81.0) | 53 (82.8) | 96 (82.1) | 69 (78.4) | 0.739 | 269 |
| Digoxin        | 65 (24.9)  | 17 (27.0) | 25 (22.3) | 23 (26.7) | 0.704 | 261 |
| ICD            | 17 (6.3)   | 10 (15.6) | 5 (4.3)   | 2 (2.3)   | 0.003 | 269 |
| CRT            | 11 (4.1)   | 4 (6.3)   | 6 (5.1)   | 1 (1.1)   | 0.212 | 269 |
| Anticoagulants | 138 (51.3) | 27 (42.2) | 64 (54.7) | 47 (53.4) | 0.243 | 269 |

Data are mean  $\pm$  standard deviation, median (interquartile range) or n (%). P-values for the comparison of all four groups (null hypothesis: all three groups have the same characteristics). Anaemia was defined as a haemoglobin < 12 g/dL, ACEI, angiotensin converting enzyme inhibitor; ARB, angiotensin II receptor blocker; BMI, body mass index; COPD, chronic obstructive pulmonary disease; CRT, cardiac resynchronization therapy; eGFR, estimated glomerular filtration rate (CKD-EPI equation); ICD, implantable cardioverter defibrillator; LVEF, left ventricular ejection fraction; MRA, mineralocorticoid receptor antagonists; NYHA, New York Heart Association; NT-proBNP, N-terminal pro-brain natriuretic peptide.

Table 3: Baseline clinical characteristics of patients with an echocardiogram performed at 1-year follow up compared to those without.



|                                    | All<br>N=3580      | No follow-up<br>echocardiogram<br>N=1696 | Follow-up<br>echocardiogram<br>N=1884 | P value<br>overall | N    |
|------------------------------------|--------------------|------------------------------------------|---------------------------------------|--------------------|------|
| Male                               | 2397 (67.0%)       | 1062 (62.6%)                             | 1335 (70.9%)                          | <0.001             | 3580 |
| Age                                | 68.2 (12.7)        | 71.1 (12.5)                              | 65.6 (12.2)                           | <0.001             | 3580 |
| LVEF                               | 38.3 (16.0)        | 41.7 (17.3)                              | 35.3 (14.0)                           | <0.001             | 3580 |
| Aetiology:                         |                    |                                          |                                       | <0.001             | 3579 |
| ischemic                           | 1600 (44.7%)       | 729 (43.0%)                              | 871 (46.3%)                           |                    |      |
| dilated                            | 552 (15.4%)        | 203 (12.0%)                              | 349 (18.5%)                           |                    |      |
| hypertensive                       | 592 (16.5%)        | 390 (23.0%)                              | 202 (10.7%)                           |                    |      |
| valvular                           | 321 (8.97%)        | 150 (8.84%)                              | 171 (9.08%)                           |                    |      |
| other                              | 514 (14.4%)        | 224 (13.2%)                              | 290 (15.4%)                           |                    |      |
| Hypertension                       | 2485 (69.4%)       | 1250 (73.7%)                             | 1235 (65.6%)                          | <0.001             | 3580 |
| Diabetes mellitus                  | 1547 (43.2%)       | 785 (46.3%)                              | 762 (40.4%)                           | <0.001             | 3580 |
| COPD                               | 721 (20.1%)        | 395 (23.3%)                              | 326 (17.3%)                           | <0.001             | 3580 |
| Atrial fibrillation                | 999 (27.9%)        | 532 (31.4%)                              | 467 (24.8%)                           | <0.001             | 3579 |
| BMI, Kg/m <sup>2</sup>             | 27.8 (5.30)        | 27.8 (5.52)                              | 27.7 (5.09)                           | 0.683              | 3528 |
| Sodium, mmol/L                     | 139 (4.33)         | 139 (3.80)                               | 139 (4.75)                            | 0.033              | 3556 |
| Anaemia                            | 1231 (34.9%)       | 686 (41.3%)                              | 545 (29.3%)                           | <0.001             | 3526 |
| NT-proBNP, ng/L                    | 1638<br>[697;3937] | 1790 [716;4432]                          | 1502 [668;3392]                       | 0.001              | 2705 |
| eGFR,<br>mL/min/1.73m <sup>2</sup> | 60.4 (25.4)        | 56.0 (25.1)                              | 64.5 (24.9)                           | <0.001             | 3562 |
| NYHA class III–IV                  | 1293 (36.1%)       | 745 (44.0%)                              | 548 (29.1%)                           | <0.001             | 3579 |
| Treatment:                         |                    |                                          |                                       |                    |      |
| ACEI or ARB                        | 2992 (83.9%)       | 1316 (78.0%)                             | 1676 (89.2%)                          | <0.001             | 3567 |
| Beta-blockers                      | 3094 (86.4%)       | 1379 (81.3%)                             | 1715 (91.0%)                          | <0.001             | 3580 |

|                             |              |              |              |        |      |
|-----------------------------|--------------|--------------|--------------|--------|------|
| MRA                         | 1890 (52.8%) | 744 (43.9%)  | 1146 (60.8%) | <0.001 | 3580 |
| Loop diuretics              | 3189 (89.1%) | 1513 (89.2%) | 1676 (89.0%) | 0.852  | 3580 |
| Digoxin                     | 959 (27.7%)  | 394 (24.0%)  | 565 (31.0%)  | <0.001 | 3467 |
| ICD                         | 396 (11.1%)  | 109 (6.43%)  | 287 (15.2%)  | <0.001 | 3578 |
| CRT                         | 234 (6.54%)  | 63 (3.71%)   | 171 (9.08%)  | <0.001 | 3580 |
| Anticoagulants              | 1684 (47.0%) | 801 (47.2%)  | 883 (46.9%)  | 0.855  | 3580 |
| 1-year mortality            | 400 (11.2%)  | 364 (21.5%)  | 36 (1.91%)   | <0.001 | 3580 |
| Baseline Ejection Fraction: |              |              |              | <0.001 | 3580 |
| Reduced                     | 2232 (62.3%) | 905 (53.4%)  | 1327 (70.4%) |        |      |
| Mid-Range                   | 504 (14.1%)  | 235 (13.9%)  | 269 (14.3%)  |        |      |
| Preserved                   | 844 (23.6%)  | 556 (32.8%)  | 288 (15.3%)  |        |      |

Data are mean  $\pm$  standard deviation, median (interquartile range) or n (%). P-values for the comparison of all four groups (null hypothesis: all three groups have the same characteristics). Anaemia was defined as a haemoglobin < 12 g/dL, ACEI, angiotensin converting enzyme inhibitor; ARB, angiotensin II receptor blocker; BMI, body mass index; COPD, chronic obstructive pulmonary disease; CRT, cardiac resynchronization therapy; eGFR, estimated glomerular filtration rate (CKD-EPI equation); ICD, implantable cardioverter defibrillator; LVEF, left ventricular ejection fraction; MRA, mineralocorticoid receptor antagonists; NYHA, New York Heart Association; NT-proBNP, N-terminal pro-brain natriuretic peptide.
